# Supplementary material for: Cation-Chloride Cotransporters, Na/K Pump, and Channels in Cell Water/Ionic Balance Regulation Under Hyperosmolar Conditions: In Silico and Experimental Studies of Opposite RVI and AVD Responses of U937 Cells to Hyperosmolar Media
Source: Front Cell Dev Biol. 2022 Jan 24;9:830563. doi: 10.3389/fcell.2021.830563 (PMC8818862; doi:10.3389/fcell.2021.830563)
Supplement: Supplementary file 3 [file DataSheet2.DOC]

        na0      k0   cl0   B0    kv   na     k     cl    beta  gamma  
        140.0    5.8  116.0  48.2 1.0  38.0  147.0  45.0  0.039 1.50
         pna      pk    pcl      inc       ikc        inkcc     hp kb
       0.00170 0.01150 0.01100 0.000070  0.0000800 0.0000000080 240 0.000 
